# Supplementary material for: In situ synthesis of C-doped BiVO4 with natural leaf as a template under different calcination temperatures
Source: Royal Society of Chemistry journal article supplement (doi:10.1039/c9ra01875a), 2019-01-01
Supplement: c9ra01875a1.pdf [file c9ra01875a1.pdf]

## In Situ Synthesis of C-doped BiVO<sub>4</sub> with Natural Leaf as Template under Different Calcination Temperature

Ruijie Yang,<sup>a,b</sup> Rongshu Zhu,<sup>a,b\*\*</sup> Yingying Fan,<sup>a,b</sup> Longjun Hu<sup>a,b</sup> and Qianqian Chen<sup>a,b</sup>

**Preparation of BiVO<sub>4</sub> impregnation solution:** The BiVO<sub>4</sub> impregnation solution was prepared as follows:<sup>1</sup> (1) 19.4 g Bi(NO<sub>3</sub>)<sub>3</sub>·5H<sub>2</sub>O was dissolved in a mixture containing 80 mL ethanol and 60 mL glycerol at 70 °C with magnetic stirring; (2) 4.68g NH<sub>4</sub>VO<sub>3</sub> was dissolved in 20 mL TMAH with gently shaking; (3) these two solutions were mixed together at 70 °C. After doing this operation, large amounts of yellow deposit appeared, added concentrated nitric acid (65%) timely until the solution became transparent.

**Morphology and microstructure analysis.** The morphologies of CNSiBiVO<sub>4</sub> were observed by FE-SEM (Fig. S1). In Fig. S1, the tubular structure (Fig. S1a and b); surface porous structure (Fig. S1c-f); side section structure (Fig. S1g) and inside section structure (Fig. S1h and i) being consist of crystal particles, can be seen, clearly. These results indicate that CNSiBiVO<sub>4</sub> has copied the multi-level structure of natural leaf successfully.

**XPS analysis:** The XPS patterns of CNSiBiVO<sub>4</sub> and BiVO<sub>4</sub> were analyzed to identify there elemental composition and chemical state. As shown in Fig. S2A, the XPS survey spectrum confirms the presence of Bi, V, O, Si, N and C elements. In Fig. S2B and C, the peaks with binding energies of 103.5 eV and 405.5 eV in the XPS spectrum of CNSiBiVO<sub>4</sub> can be attributed to Si 2p (103.4 eV) and N 1s (405.5 eV),<sup>2</sup> while these peaks are not appear in the spectrum of BiVO<sub>4</sub>. These results indicate that, parts of the original Si and N element of the leaf were doped in CNSiBiVO<sub>4</sub> in the calcination process, and the Si element is present at Si<sup>4+</sup>.<sup>2</sup> As displayed in Fig. S2D, the peaks with binding energies of 284.4 eV and 286.0 eV can be attributed to C-C bond (comes from carbon tape) and C-V bond (doped into CNSiBiVO<sub>4</sub> lattice), which confirms C element doped in CNSiBiVO<sub>4</sub>, similar to Si and N elements. Fig. S2E shows the XPS spectra of Bi in BiVO<sub>4</sub> and CNSiBiVO<sub>4</sub>. Each spectrum has two major peaks with binding energies at about 159.4 eV or 159.3 eV and 164.6 eV or 164.5 eV which correspond to Bi 4f<sub>7/2</sub> and Bi 4f<sub>5/2</sub>, respectively, demonstrating that the valence state of Bi in the BiVO<sub>4</sub> and CNSiBiVO<sub>4</sub> are +3.<sup>3, 4, 5</sup> In Fig. S2F, V 2p shows binding energy at 524.4 or 524.3 eV for V 2p<sub>1/2</sub>.<sup>6, 7</sup> And the other two peaks at around 516.7 or 516.6 and 517.4 or 517.2 eV were attributed to V<sup>4+</sup> and V<sup>5+</sup>, respectively.<sup>8, 9</sup> It is noteworthy that, for BiVO<sub>4</sub>, the ratio of V<sup>4+</sup> to V<sup>5+</sup> is 1.08, by contrast, in case of CNSiBiVO<sub>4</sub>, the ratio is 1.63, which probably owing to V<sup>5+</sup> was replaced by Si<sup>4+</sup>, because Si<sup>4+</sup> (0.41 nm) has a close ion radius with V<sup>5+</sup> (0.59 nm).<sup>2</sup> The decrease of V<sup>5+</sup> lead to the oxygen vacancy increase,<sup>10</sup> which can inhibit the recombination of photogenerated electrons and holes. Fig. S2G displays the O 1s spectrum of BiVO<sub>4</sub> and CNSiBiVO<sub>4</sub>, which can be divided into two peaks located at 229.9 eV or 229.6 and 231.4 or 231.3 eV, corresponding to lattice oxygen (Olatt) and surface adsorption oxygen (Oabs), respectively.<sup>11, 12</sup> For BiVO<sub>4</sub>, the ratio of Oabs to Olatt is 0.53, by contrast, in case of CNSiBiVO<sub>4</sub>, the ratio is 1.31. The production of oxygen vacancy is closely related to surface adsorption oxygen. These results indicate that CNSiBiVO<sub>4</sub> has more oxygen vacancy compare with BiVO<sub>4</sub>, which is consistent with the inference of V 2p.

<sup>a</sup>. Shenzhen Key Laboratory of Organic Pollution Prevention and Control, Environmental Science and Engineering Research Center, Harbin Institute of Technology (Shenzhen), Shenzhen 518055, P. R. China.

<sup>b</sup>. International Joint Research Center for Persistent Toxic Substances, Harbin Institute of Technology (Shenzhen), Shenzhen 518055, P. R. China.

E-mail: rszhu@hit.edu.cn.

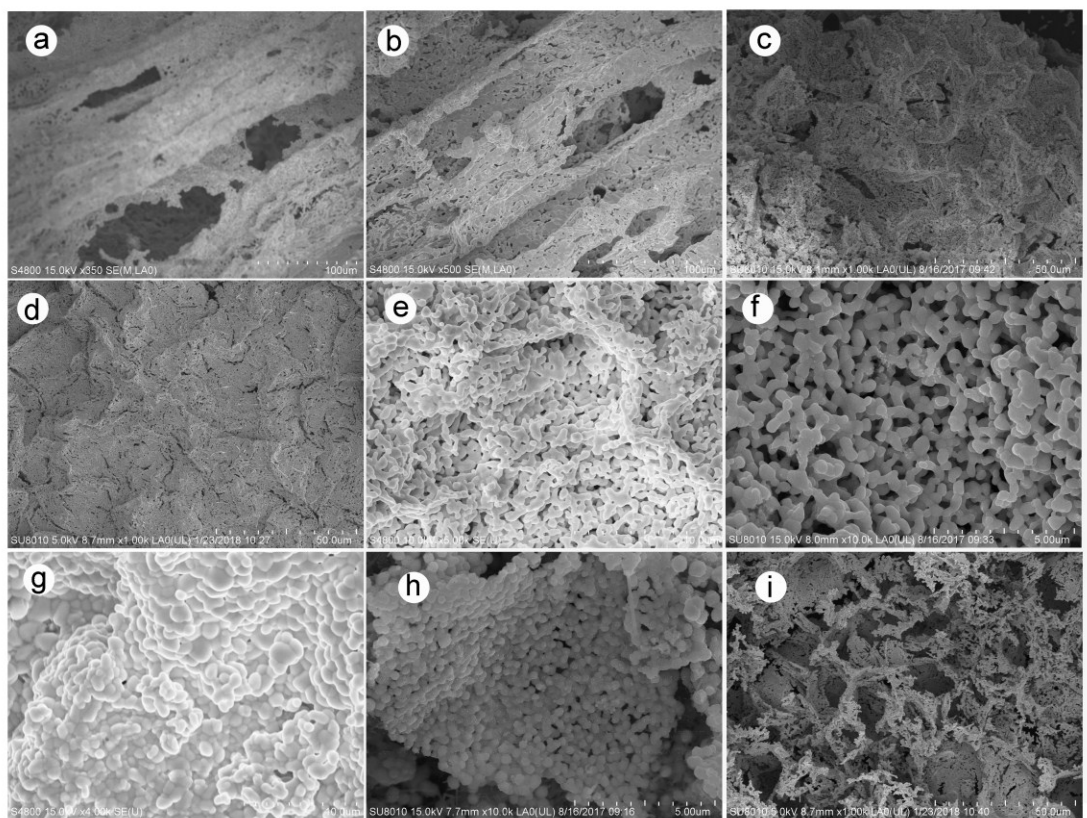

**Fig. S1.** FE-SEM images of the as-prepared CNSiBiVO<sub>4</sub>. (a and b) the vein section of CNSiBiVO<sub>4</sub>; (c-f) the surface section of CNSiBiVO<sub>4</sub>; (g) the side section of the CNSiBiVO<sub>4</sub>; (h-i) the inside section of CNSiBiVO<sub>4</sub>.

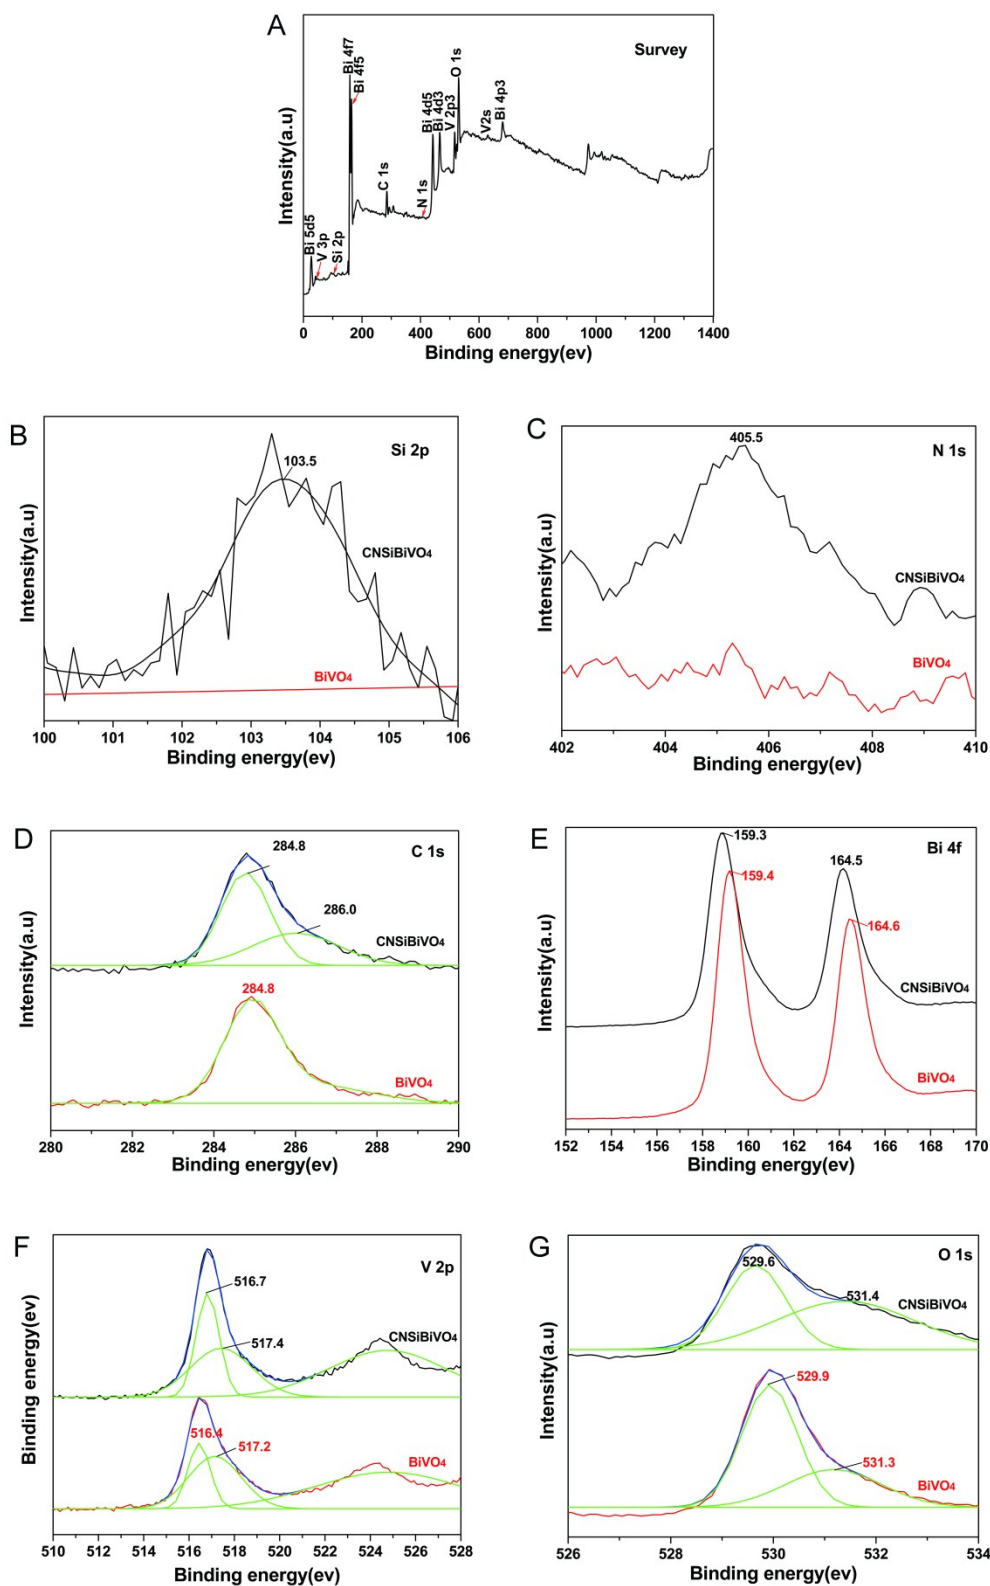

**Fig. S2.** XPS spectra of the as-prepared BiVO<sub>4</sub> and CNSiBiVO<sub>4</sub>: (A) survey spectrum of CNSiBiVO<sub>4</sub>; (B) Si 2p; (C) N 1s; (D) C 1s; (E) Bi 4f; (F) V 2p and (G) O 2p.

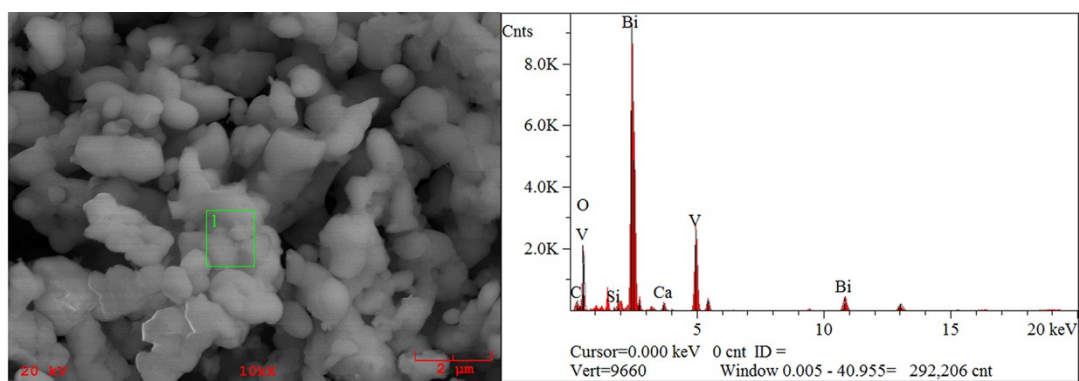

| Elt. | Line | Intensity<br>(c/s) | Atomic<br>% | Conc    | Units | Error<br>2-sig | MDL<br>3-sig |       |
|------|------|--------------------|-------------|---------|-------|----------------|--------------|-------|
| C    | Ka   | 60.54              | 9.780       | 2.577   | wt.%  | 0.142          | 0.163        |       |
| N    | Ka   | 32.91              | 8.126       | 2.497   | wt.%  | 0.202          | 0.246        |       |
| O    | Ka   | 328.45             | 55.512      | 19.483  | wt.%  | 0.341          | 0.237        |       |
| Si   | Ka   | 21.97              | 0.358       | 0.220   | wt.%  | 0.048          | 0.070        |       |
| Ca   | Ka   | 69.60              | 0.987       | 0.868   | wt.%  | 0.058          | 0.077        |       |
| V    | Ka   | 757.28             | 11.925      | 13.325  | wt.%  | 0.153          | 0.105        |       |
| Bi   | La   | 133.56             | 13.313      | 61.029  | wt.%  | 2.008          | 2.054        |       |
|      |      |                    | 100.000     | 100.000 | wt.%  |                |              | Total |

**Fig. S3.** The EDS for BiVO<sub>4</sub>-600.

## References

1. R. Yan, M. Chen, H. Zhou, T. Liu, X. Tang, K. Zhang, H. Zhu, J. Ye, D. Zhang and T. Fan, *Sci Rep*, 2016, **6**, 20001.
2. X. Zhang, X. Quan, S. Chen and Y. Zhang, *Journal of hazardous materials*, 2010, **177**, 914-917.
3. S. Balachandran, N. Prakash, K. Thirumalai, M. Muruganandham, M. Sillanpää and M. Swaminathan, *Industrial & Engineering Chemistry Research*, 2014, **53**, 8346-8356.
4. J. Choi, P. Sudhagar, J. H. Kim, J. Kwon, J. Kim, C. Terashima, A. Fujishima, T. Song and U. Paik, *Physical chemistry chemical physics : PCCP*, 2017, **19**, 4648-4655.
5. Y. Deng, L. Tang, G. Zeng, C. Feng, H. Dong, J. Wang, H. Feng, Y. Liu, Y. Zhou and Y. Pang, *Environ. Sci.: Nano*, 2017, **4**, 1494-1511.
6. M. Zalfani, B. van der Schueren, Z.-Y. Hu, J. C. Rooke, R. Bourguiga, M. Wu, Y. Li, G. Van Tendeloo and B.-L. Su, *J. Mater. Chem. A*, 2015, **3**, 21244-21256.
7. Y. Zhang, Y. Guo, H. Duan, H. Li, C. Sun and H. Liu, *Physical chemistry chemical physics : PCCP*, 2014, **16**, 24519-24526.
8. J. Sun, X. Li, Q. Zhao, J. Ke and D. Zhang, *The Journal of Physical Chemistry C*, 2014, **118**, 10113-10121.
9. Z. Wang, J. Xuan, B. Liu and J. He, *Journal of Industrial Textiles*, 2013, **44**, 868-883.
10. M. Wang, Q. Liu, Y. Che, L. Zhang and D. Zhang, *Journal of Alloys and Compounds*, 2013, **548**, 70-76.
11. X. Wu, J. Zhao, S. Guo, L. Wang, W. Shi, H. Huang, Y. Liu and Z. Kang, *Nanoscale*, 2016, **8**, 17314-17321.
12. S. H. Yun, P. G. Ingole, W. K. Choi, J. H. Kim and H. K. Lee, *J. Mater. Chem. A*, 2015, **3**, 7888-7899.
